# Supplementary material for: Diagnosis, Treatment, and Management of Otitis Media with Artificial Intelligence
Source: MDPI journal article supplement (doi:10.3390/diagnostics13132309), 2023-07-07
Supplement: s1 [file s1]

## Supplementary

Table S1: ML-related articles for the diagnosis of OM with otoscopy

| Year | Author                             | Classes | Images     | Model                   | Accuracy | Sensitivity | Specificity | Dice  |
|------|------------------------------------|---------|------------|-------------------------|----------|-------------|-------------|-------|
| 2022 | Sandström J <sup>Error!</sup>      | 3       | 273        | GoogleNet               | 95%      | 93%         | 100%        | —     |
| 2022 | Chen YC <sup>Error!</sup>          | 10      | 2820       | InceptionV3             | 98%      | 97.90%      | 99.80%      | —     |
| 2022 | Mao C <sup>Error! Reference</sup>  | 4       | 2657       | EfficientNet            | 92.42%   | —           | —           | —     |
| 2022 | Crowson MG <sup>Error!</sup>       | 3       | 661        | ResNet, DenseNet        | 95.50%   | —           | —           | —     |
| 2022 | Moham KK <sup>Error!</sup>         | 4       | 880        | CNN, LSTM               | 100%     | 100%        | 100%        | —     |
| 2022 | Choi Y <sup>Error! Reference</sup> | 3       | 6630       | EfficientNet            | 95.32%   | 95.38%      | 94.65%      | —     |
| 2022 | Habib AR <sup>Error!</sup>         | 5       | 6527       | ResNet                  | 74.50%   | —           | —           | —     |
| 2022 | Zeng J <sup>Error! Reference</sup> | 2       | 2790       | ResNet, UNet            | 81%      | —           | —           | —     |
| 2022 | Byun H <sup>Error!</sup>           | 2       | 1130       | CNN                     | 94.10%   | 91.60%      | 96.00%      | —     |
| 2022 | Viscaino M <sup>Error!</sup>       | 4       | 22000      | VGG16                   | 92%      | 85%         | 95%         | —     |
| 2021 | Alhud A <sup>Error!</sup>          | 4       | 857        | CNN                     | 98.26%   | 97.68%      | 99.30%      | —     |
| 2021 | Cai Y <sup>Error! Reference</sup>  | 4       | 7146       | CNN                     | 93.37%   | —           | —           | —     |
| 2021 | Byun H <sup>Error!</sup>           | 4       | 2372       | ResNet                  | 97.18%   | —           | —           | —     |
| 2021 | Crowson MG <sup>Error!</sup>       | 2       | 338        | ResNet                  | 83.80%   | —           | —           | —     |
| 2021 | Pham VT <sup>Error!</sup>          | 4       | 1012       | CNN                     | 95.80%   | 92.00%      | 97.60%      | 0.929 |
| 2021 | Sundgaard JV <sup>Error!</sup>     | 3       | 1336       | InceptionV3             | 86%      | —           | —           | —     |
| 2021 | Zeng X <sup>Error!</sup>           | 8       | 20542      | DenseNet                | 95.59%   | —           | —           | —     |
| 2021 | Kashani RG <sup>Error!</sup>       | 2       | 1179       | CNN                     | 90.30%   | 90.50%      | 90.10%      | —     |
| 2021 | Tsutsu K <sup>Error!</sup>         | 5       | 400        | MobileNetV2             | 77%      | 88%         | 84%         | —     |
| 2021 | Basar E <sup>Error!</sup>          | 2       | 282        | VGG16                   | 88.56%   | 86.52%      | 90.25%      | —     |
| 2021 | Cha D <sup>Error! Reference</sup>  | 6       | 7500       | ResNet                  | 82.03%   | —           | —           | —     |
| 2021 | Wang W <sup>Error!</sup>           | 2       | 100(video) | ResNet                  | 81.70%   | 83%         | 80%         | —     |
| 2021 | Binol H <sup>Error!</sup>          | 4       | 394(video) | CNN                     | 84.80%   | 80.20%      | 94.40%      | —     |
| 2020 | Wu Z <sup>Error! Reference</sup>   | 3       | 12305      | Xception                | 97.82%   | 96.76%      | 98.37%      | —     |
| 2020 | Khan MA <sup>Error!</sup>          | 3       | 2904       | DenseNet                | 94.90%   | —           | —           | —     |
| 2020 | Cama S <sup>Error!</sup>           | 3       | 454        | InceptionV2, ResNet     | 88.10%   | —           | —           | —     |
| 2020 | Visc MV <sup>Error!</sup>          | 4       | 720        | SVM                     | 99.03%   | 98.06%      | 99.35       | —     |
| 2020 | VT Pham <sup>Error!</sup>          | 2       | 1139       | CNN                     | —        | —           | —           | 0.895 |
| 2020 | Habib AR <sup>Error!</sup>         | 3       | 233        | InceptionV3             | 76%      | —           | —           | —     |
| 2020 | Binol H <sup>Error!</sup>          | 2       | 73         | Random forest           | 84.60%   | —           | —           | —     |
| 2020 | Binol H <sup>Error!</sup>          | 6       | 136(video) | UNet                    | —        | —           | —           | 0.84  |
| 2019 | Cha D <sup>Error! Reference</sup>  | 6       | 10544      | InceptionV3, ResNet     | 94.20%   | 93.69%      | 96.82%      | —     |
| 2019 | Côme Z <sup>Error!</sup>           | 4       | 956        | VGG16                   | 99.47%   | 99.35%      | 99.77%      | —     |
| 2019 | Livi D <sup>Error! Reference</sup> | 14      | 1366       | Google-AutoML-interface | 88.70%   | 86.10%      | —           | —     |
| 2019 | Lee JY <sup>Error! Reference</sup> | 2       | 3156       | CNN                     | 91.00%   | 90.50%      | 92.90%      | —     |
| 2019 | Seok J <sup>Error! Reference</sup> | 2       | 920        | Mask R-CNN              | 91.35%   | 81.36%      | 96.03%      | —     |

|      |                                    |    |      |               |        |        |        |   |
|------|------------------------------------|----|------|---------------|--------|--------|--------|---|
| 2018 | Tran TT <sup>Error!</sup>          | 3  | 1230 | CNN           | 91.41% | 89.48% | 93.33% | — |
| 2018 | Mybu HC <sup>Error!</sup>          | 5  | 389  | CNN           | 86.84% | 86.80% | 96.40% | — |
| 2018 | Sena C <sup>Error! Reference</sup> | 14 | 247  | CNN           | 84.90% | —      | —      | — |
| 2018 | Kashani MS <sup>Error!</sup>       | 2  | 108  | InceptionV3   | 82.20% | —      | —      | — |
| 2016 | Mybu HC <sup>Error!</sup>          | 3  | 562  | Decision Tree | 80.61% | 80.60% | 94.40% | — |
| 2015 | Chue KS <sup>Error!</sup>          | 2  | 1195 | SVM           | 88.50% | 89.63% | 86.90% | — |
| 2014 | CK Shie <sup>Error!</sup>          | 2  | 865  | Adaboost      | 88.06% | —      | —      | — |

Table S2: ML-related articles for the diagnosis of OM based on CT, X-ray, OCT and tympanogram

| Type         | Year | Author                                        | Classes | Images | Model                 | Accuracy | Sensitivity | Specificity | AUC   |
|--------------|------|-----------------------------------------------|---------|--------|-----------------------|----------|-------------|-------------|-------|
| CT           | 2022 | Wang ZC <sup>Error! Reference source</sup>    | 4       | 973    | CNN                   | 90.10%   | —           | —           | 0.96  |
| CT           | 2022 | Eroglu O <sup>Error! Reference source</sup>   | 4       | 3093   | CNN                   | 95.40%   | 95.13%      | 97.92%      | —     |
| CT           | 2022 | Takah M <sup>Error! Reference source</sup>    | 2       | 4950   | MobileNet-V2          | 81.14%   | 84.95%      | 77.33%      | —     |
| CT           | 2022 | Duan B <sup>Error! Reference source not</sup> | 4       | 1872   | GoogleNet             | 99%      | —           | —           | —     |
| CT           | 2020 | Wang YM <sup>Error! Reference</sup>           | 4       | 1147   | Inception-V3          | —        | 83.30%      | 91.40%      | 0.92  |
| X-ray        | 2020 | Lee KJ <sup>Error! Reference source not</sup> | 2       | 9988   | CNN                   | 90.10%   | 96.4%       | 74.5%       | 0.968 |
| OCT          | 2022 | Monroy GL <sup>Error! Reference</sup>         | 4       | 175    | Random forest         | 95.41%   | —           | —           | —     |
| OCT          | 2019 | Monroy GL <sup>Error! Reference</sup>         | 3       | 58     | Random forest         | 91.10%   | —           | —           | —     |
| Tympanometry | 2022 | Sundgaard JV <sup>Error! Reference</sup>      | 3       | 1014   | CNN                   | 92.60%   | 92.20%      | 92.90%      | 0.97  |
| Tympanometry | 2021 | Mercha GR <sup>Error! Reference</sup>         | 4       | 63     | multivariate logistic | 94.84%   | 95.07%      | 94.64%      | 0.99  |
| Tympanometry | 2021 | E. M. Grais <sup>Error! Reference</sup>       | 2       | 672    | CNN                   | 82%      | —           | —           | 0.79  |
| Tympanometry | 2020 | H. BinoJ <sup>Error! Reference source</sup>   | 2       | 73     | Random forest         | 84.90%   | —           | —           | —     |

Table S3: Articles for diagnosis of OM using NLP

| Year | Author                                         | Classes | Images       | Model         | Accuracy | Sensitivity | Specificity | F1-score |
|------|------------------------------------------------|---------|--------------|---------------|----------|-------------|-------------|----------|
| 2021 | Binol H <sup>Error! Reference source not</sup> | 4       | 173          | NCA           | —        | 87.6        | 94.4        | 90.20%   |
| 2020 | Joshua C <sup>Error! Reference source</sup>    | 2       | 2724         | NLP           | —        | 83.40%      | 95.40%      | —        |
| 2013 | Kuruvilla A <sup>Error! Reference</sup>        | 4       | 783 patients | Random forest | 89.90%   | —           | —           | —        |
| 2012 | Kuruvilla A <sup>Error! Reference</sup>        | 4       | 826          | Classifier    | 84%      | —           | —           | —        |

Table S4: Articles related to the application of ML in OM surgery

| Type          | Year | Author                                          | Classes | Images | Model       | Accuracy | Sensitivity | Specificity | AUC  |
|---------------|------|-------------------------------------------------|---------|--------|-------------|----------|-------------|-------------|------|
| Tube          | 2020 | Camalan S <sup>Error! Reference source</sup>    | 3       | 454    | InceptionV2 | 88.10%   | —           | —           | 0.96 |
| Tube          | 2019 | Devon Livingstone <sup>Error!</sup>             | 3       | 734    | CNN         | 84.40%   | —           | —           | —    |
| Tube          | 2015 | Xin Wang <sup>Error! Reference source not</sup> | 2       | 215    | SVM         | 90%      | 85%         | 92%         | —    |
| Cholesteatoma | 2021 | Miwa T <sup>Error! Reference source not</sup>   | 3       | 312    | SSD         | —        | 42.30%      | 87.50%      | —    |

Table S5: Articles related to the application of ML in the registration of OM surgery.

| Type         | Year | Author                                                | Classes | Patients | Model    | mIOU  | mDice |
|--------------|------|-------------------------------------------------------|---------|----------|----------|-------|-------|
| Registration | 2022 | Ding AS <sup>Error! Reference source not found.</sup> | 16      | 16       | ANTs     | —     | 0.56  |
| Registration | 2022 | Dong B <sup>Error! Reference source not found.</sup>  | 1       | 17       | FNSegNet | 0.764 | 0.858 |

|              |      |                                                         |   |              |                    |      |        |
|--------------|------|---------------------------------------------------------|---|--------------|--------------------|------|--------|
| Registration | 2021 | Neves CA <sup>Error! Reference source not found.</sup>  | 4 | 150 (images) | AH-Net             | —    | 0.82   |
| Registration | 2021 | Nikan S <sup>Error! Reference source not found.</sup>   | 8 | 39           | PWD                | —    | 0.86   |
| Registration | 2020 | Ly Y <sup>Error! Reference source not found.</sup>      | 3 | 30           | W-Net              | —    | 0.797  |
| Registration | 2020 | Jeeva S <sup>Error! Reference source not found.</sup>   | 4 | 50           | Mask R-CNN         | 0.79 | 0.96   |
| Registration | 2019 | Fausser J <sup>Error! Reference source not found.</sup> | 9 | 24           | ASUNet             | —    | 0.663  |
| Registration | 2019 | Gare BM <sup>Error! Reference source not found.</sup>   | 1 | 28           | Atlas registration | —    | 0.76   |
| Registration | 2018 | Powell KA <sup>Error! Reference source not found.</sup> | 6 | 26           | Atlas registration | —    | 0.7785 |
| Registration | 2017 | Lu J <sup>Error! Reference source not found.</sup>      | 1 | 15           | Random forest      | —    | 0.818  |
| Registration | 2014 | Becker M <sup>Error! Reference source not found.</sup>  | 8 | 42           | PASM               | —    | 0.802  |
| Registration | 2011 | Noble JH <sup>Error! Reference source not found.</sup>  | 7 | 6            | ASM                | —    | 0.745  |

Table S6: Articles related to the application of ML in the health management of OM [1–98].

| Type | Year | Author                                                    | Classes | Patients | Model              | Accuracy                           | Sensitivity | Specificity |
|------|------|-----------------------------------------------------------|---------|----------|--------------------|------------------------------------|-------------|-------------|
| NLP  | 2022 | Koyam H <sup>Error! Reference source not found.</sup>     | 2       | 105      | RF, SVM, kNN       | 81.50%                             | —           | —           |
| NLP  | 2017 | Dowell A <sup>Error! Reference source not found.</sup>    | 6       | 77582    | Software Inference | The Curve of OM morbidity spectrum |             |             |
| NLP  | 2012 | Szaleniec J <sup>Error! Reference source not found.</sup> | 2       | 150      | NN                 | 84%                                | —           | —           |
| CV   | 2020 | Camalan S <sup>Error! Reference source not found.</sup>   | 3       | 454      | InceptionV2        | 88.10%                             | —           | —           |
| CV   | 2019 | Devon Livingstone <sup>Error!</sup>                       | 3       | 734      | CNN                | 84.40%                             | —           | —           |
| CV   | 2015 | Xin Wang <sup>Error! Reference source not found.</sup>    | 2       | 215      | SVM                | 90%                                | 85%         | 92%         |
